# Supplementary material
Source: MDPI journal article supplement (https://www.mdpi.com/1424-2818/14/12/1031)
Supplement: s1 [file s1]

Supplementary Materials

# Soil Invertebrate Communities as Indicator of Ecological Conservation Status of Some Fertilised Grasslands from Romania

**Table S1.** A detailed description of investigated grasslands from Bucegi Mountains, Romania. (CG= control plot; A, B, C, D = experimental plots).

| Code | Type of grassland | Longitude   | Latitude     | Exposure | Dominant plants                                                                                                                                                                                                                                            | Type of soil | Type of management                             | Fertilization                                                                                                                | Period of fertilization             | Soil taxa richness |
|------|-------------------|-------------|--------------|----------|------------------------------------------------------------------------------------------------------------------------------------------------------------------------------------------------------------------------------------------------------------|--------------|------------------------------------------------|------------------------------------------------------------------------------------------------------------------------------|-------------------------------------|--------------------|
| CG   | Natural           | 45°21'23.7" | 025°27'38.9" | 1758 m   | <i>Agrostis capillaris</i> L.,<br><i>Festuca ovina</i> L.,<br><i>Ligusticum mutellina</i> (L.) Crantz,<br><i>Nardus stricta</i> L.,<br><i>Potentilla aurea</i> L.,<br><i>Polytrichum</i> sp.,<br><i>Ranunculus acris</i> L.,<br><i>Trifolium repens</i> L. | Podzol       | Overgrazing, with cows, 85-90 days/year.       | None                                                                                                                         | None                                | 10                 |
| A    | Semi-natural      | 45°21'24.3" | 025°27'39.5" | 1758 m   | <i>Agrostis capillaris</i> L.,<br><i>Deschampsia cespitosa</i> (L.) P. Beauv.,<br><i>Festuca rubra</i> L.,<br><i>Phleum alpinum</i> L.,<br><i>Poa pratensis</i> L.,<br><i>Polygonum bistorta</i> L.                                                        | Podzol       | Controlled grazing with cows, 85-90 days/year. | An average application rate per year by 100 kg ha <sup>-1</sup> N + 50 kg ha <sup>-1</sup> P2O5 + 50 kg ha <sup>-1</sup> K2O | 2000-2002<br>2010-2012<br>2014-2016 | 10                 |
| B    | Semi-natural      | 45°21'24.9" | 025°27'39.9" | 1782 m   | <i>Deschampsia cespitosa</i> (L.) P. Beauv.,<br><i>Phleum alpinum</i> L.,<br><i>Phleum pratense</i> L.,<br><i>Ranunculus acris</i> L.,                                                                                                                     | Podzol       | Controlled grazing with cows, 85-90 days/year. | An average application rate per year by 150 kg ha <sup>-1</sup> N + 75 kg ha <sup>-1</sup> P2O5                              | 1996-1998                           | 11                 |

|   |                  |                 |                  |           |                                                                                                                                                                                                                    |            |                                                                      |                                                                                                                                                                                                                  |                      |    |
|---|------------------|-----------------|------------------|-----------|--------------------------------------------------------------------------------------------------------------------------------------------------------------------------------------------------------------------|------------|----------------------------------------------------------------------|------------------------------------------------------------------------------------------------------------------------------------------------------------------------------------------------------------------|----------------------|----|
|   |                  |                 |                  |           | <i>Trifolium repens</i><br>L.                                                                                                                                                                                      |            |                                                                      | + 75 kg ha-<br>1 K2O                                                                                                                                                                                             | 2004<br>2010<br>2016 |    |
|   |                  |                 |                  |           |                                                                                                                                                                                                                    |            |                                                                      | Organicall<br>y fertilised<br>by<br>paddockin<br>g with<br>dairy<br>cows.                                                                                                                                        |                      |    |
|   |                  |                 |                  |           |                                                                                                                                                                                                                    |            |                                                                      | 2/3 Ah<br>(hydrolytic<br>acidity),<br>sterile lime<br>powder<br>(CaO) was<br>used, in a<br>dose of<br>approxima<br>tely 7.5<br>tons / ha.<br>The<br>powdered<br>lime was<br>spread on<br>the surface<br>of land. | 1995                 |    |
| C | Semi-<br>natural | 45°21'24.<br>7" | 025°27'35.<br>0" | 1782<br>m | <i>Agrostis vinealis</i><br>Schreb.,<br><i>Ligusticum<br/>mutellina</i> (L.)<br>Crantz, <i>Poa<br/>annua</i> L., <i>Poa<br/>pratensis</i> L.,<br><i>Polygonum<br/>bistorta</i> L.,<br><i>Trifolium repens</i><br>L | Podz<br>ol | Controle<br>d<br>grazing<br>with<br>cows,<br>85-90<br>days/yea<br>r. | An<br>average<br>application<br>rate per<br>year by<br>150 kg ha-<br>1 N + 75 kg<br>ha-1 P2O5<br>+ 75 kg ha-<br>1 K2O                                                                                            | 1996-<br>1998        | 10 |
|   |                  |                 |                  |           |                                                                                                                                                                                                                    |            |                                                                      | Organicall<br>y fertilised<br>by<br>paddockin<br>g with<br>dairy<br>cows.                                                                                                                                        | 2003<br>2009<br>2015 |    |
| D | Semi-<br>natural | 45°21'23.<br>9" | 025°27'34.<br>5" | 1784<br>m | <i>Alchemilla<br/>vulgaris</i> L.,                                                                                                                                                                                 | Podz<br>ol | Controle<br>d                                                        | Herbicide<br>Grassland                                                                                                                                                                                           | 1995                 | 13 |

| Species                                                                                                                                                                                       | Management                                                                                                                                                                                                                                                                                                                           | Year           |
|-----------------------------------------------------------------------------------------------------------------------------------------------------------------------------------------------|--------------------------------------------------------------------------------------------------------------------------------------------------------------------------------------------------------------------------------------------------------------------------------------------------------------------------------------|----------------|
| <i>Deschampsia cespitosa</i> (L.) P. Beauv., <i>Festuca rubra</i> L., <i>Holcus lanatus</i> L., <i>Ranunculus acris</i> L., <i>Taraxacum officinale</i> F.H.Wigg., <i>Trifolium repens</i> L. | grazing with Roundup at 5 l ha <sup>-1</sup> 85-90 days/year. Calcium liming (the CaO was incorporated in soil)                                                                                                                                                                                                                      | 1995           |
|                                                                                                                                                                                               | Reseeded with a mixture of grasses and perennial legumes: <i>Phleum pratense</i> L. Favorit variety (40%), <i>Festuca pratensis</i> Huds. Transilvan variety (25%), <i>Lolium perenne</i> L. Marta variety (5%), <i>Trifolium hybridum</i> L.- local population from Braşov (15%), <i>Lotus corniculatus</i> L. Livada variety (15%) | 1996-1998      |
|                                                                                                                                                                                               | An average application rate per                                                                                                                                                                                                                                                                                                      | 2002 2008 2014 |

year by  
150 kg ha-  
1 N + 75 kg  
ha-1 P2O5  
+ 75 kg ha-  
1 K2O

Organicall  
y fertilised  
by  
paddockin  
g with  
dairy  
cows.

**Table S2.** Model selection results. Models are ranked in a decreasing order of the Akaike weights ( $w_i$ ). For clarity, models with  $w_i < 0.02$  are not shown. Statistics include: LL - log likelihood; K - number of parameters; the second-order Akaike information criterion corrected for small sample sizes AICc;  $\Delta_i$  - AICc differences;  $w_i$  - Akaike weights.

| Model structure.        | LL       | K  | AICc    | $\Delta_i$ | $w_i$ |
|-------------------------|----------|----|---------|------------|-------|
| Abundance               |          |    |         |            |       |
| VegCovr + pH            | -1288.81 | 4  | 2585.62 | 0.00       | 0.35  |
| VegCovr + Ts + pH       | -1288.49 | 5  | 2586.97 | 1.35       | 0.18  |
| VegCovr + Rhs + pH      | -1288.49 | 5  | 2586.98 | 1.36       | 0.18  |
| VegCovr + pH + RPs      | -1288.81 | 5  | 2587.61 | 2.00       | 0.13  |
| VegCovr + Ts + Rhs + pH | -1288.03 | 6  | 2588.07 | 2.45       | 0.10  |
| Species richness        |          |    |         |            |       |
| pH                      | -485.66  | 3  | 977.33  | 0.00       | 0.15  |
| VegCovr + pH            | -484.95  | 4  | 977.91  | 0.58       | 0.11  |
| pH + RPs                | -485.09  | 4  | 978.18  | 0.85       | 0.10  |
| VegCovr + pH + RPs      | -484.53  | 5  | 979.06  | 1.73       | 0.06  |
| Rhs + pH                | -485.60  | 4  | 979.21  | 1.88       | 0.06  |
| Ts + pH                 | -485.66  | 47 | 979.33  | 2.00       | 0.06  |
| RPs                     | -486.73  | 3  | 979.45  | 2.12       | 0.05  |
| VegCovr + Rhs + pH      | -484.75  | 5  | 979.51  | 2.18       | 0.05  |
| VegCovr + Ts + pH       | -484.95  | 5  | 979.91  | 2.58       | 0.04  |
| Rhs + pH + RPs          | -485.05  | 5  | 980.09  | 2.76       | 0.04  |

---

| Model structure. | LL      | K | AICc   | $\Delta_i$ | $w_i$ |
|------------------|---------|---|--------|------------|-------|
| VegCovr          | -487.06 | 3 | 980.13 | 2.80       | 0.04  |
| VegCovr + RPs    | -486.31 | 4 | 980.62 | 3.29       | 0.03  |

---
